# Supplementary material for: A general route for the mass production of graphene-enhanced carbon composites toward practical pouch lithium-ion capacitors
Source: Royal Society of Chemistry journal article supplement (doi:10.1039/d1ta03933d), 2021-01-01
Supplement: d1ta03933d1.pdf [file d1ta03933d1.pdf]

## Supplementary Information

### A general route for mass-production of graphene-enhanced carbon composites toward practical pouch lithium-ion capacitors

Yabin An,<sup>a</sup> Tengyu Liu,<sup>a</sup> Chen Li,<sup>a</sup> Xiong Zhang,<sup>\*abc</sup> Tao Hu,<sup>ab</sup> Xianzhong Sun,<sup>ab</sup> Kai Wang,<sup>abc</sup> Chengduo Wang,<sup>d</sup> and Yanwei Ma<sup>\*abd</sup>

<sup>a</sup>. Institute of Electrical Engineering, Chinese Academy of Sciences, Beijing 100190, China

<sup>b</sup>. School of Engineering Sciences, University of Chinese Academy of Sciences, Beijing 100049, China

<sup>c</sup>. Dalian National Laboratory for Clean Energy, Chinese Academy of Sciences, Dalian 116023, Liaoning, China

<sup>d</sup>. School of Materials Science and Engineering, Zhengzhou University, Zhengzhou 450001, Henan, China.

Corresponding Authors: zhangxiong@mail.iee.ac.cn (X. Zhang), ywma@mail.iee.ac.cn (Y. Ma)

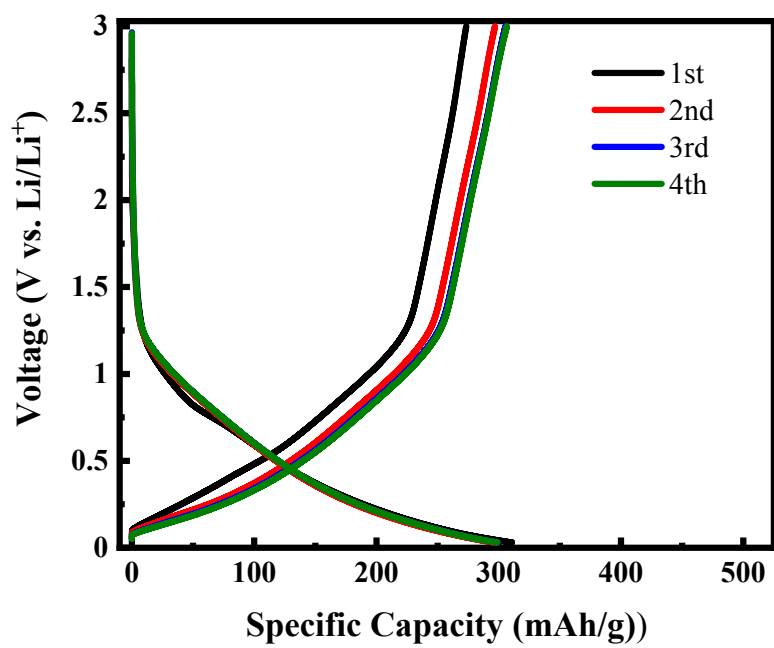

**Figure S1.** The charge and discharge profiles of pure SC at  $0.1 \text{ A g}^{-1}$ .

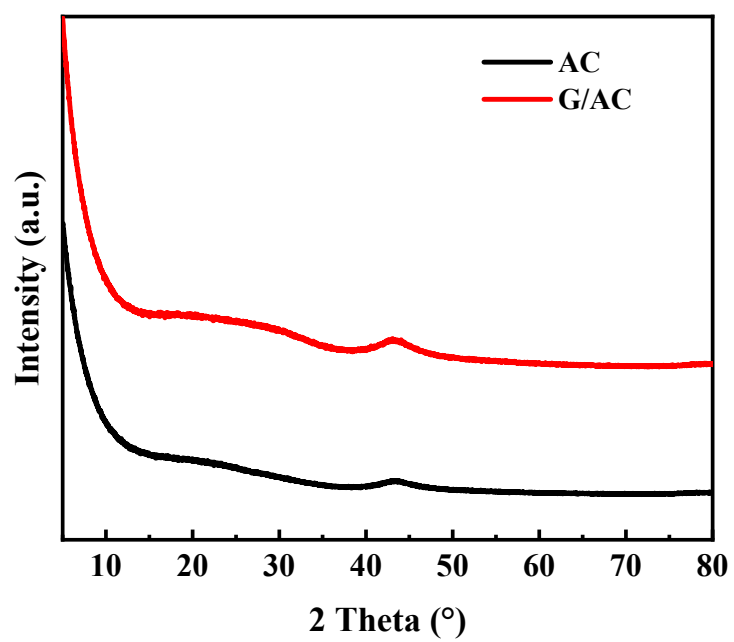

**Figure S2.** XRD patterns of pure AC and G/AC.

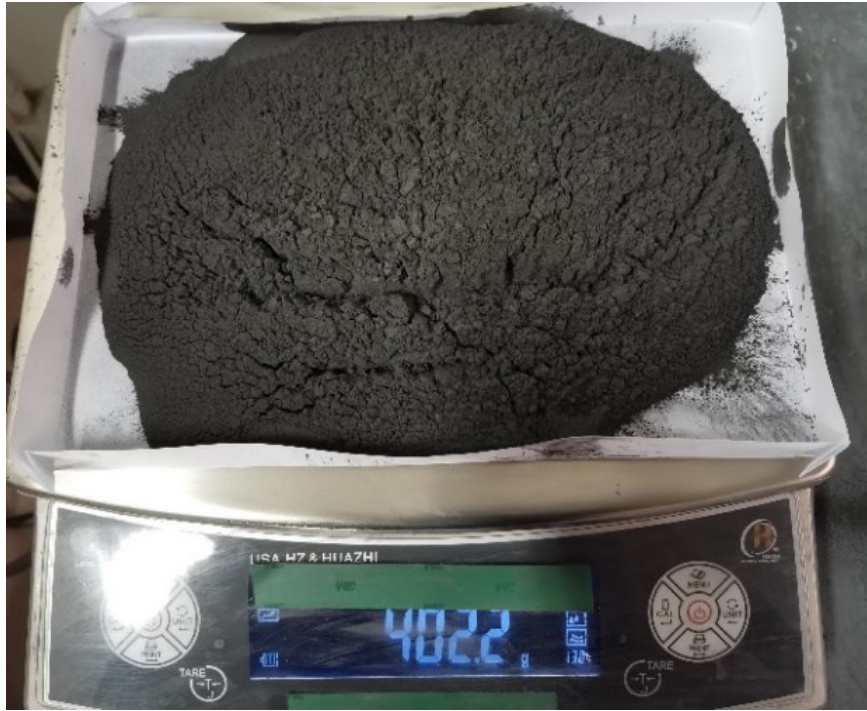

**Figure S3.** The photograph of 400 g G/SC-2.5% prepared by SHS.

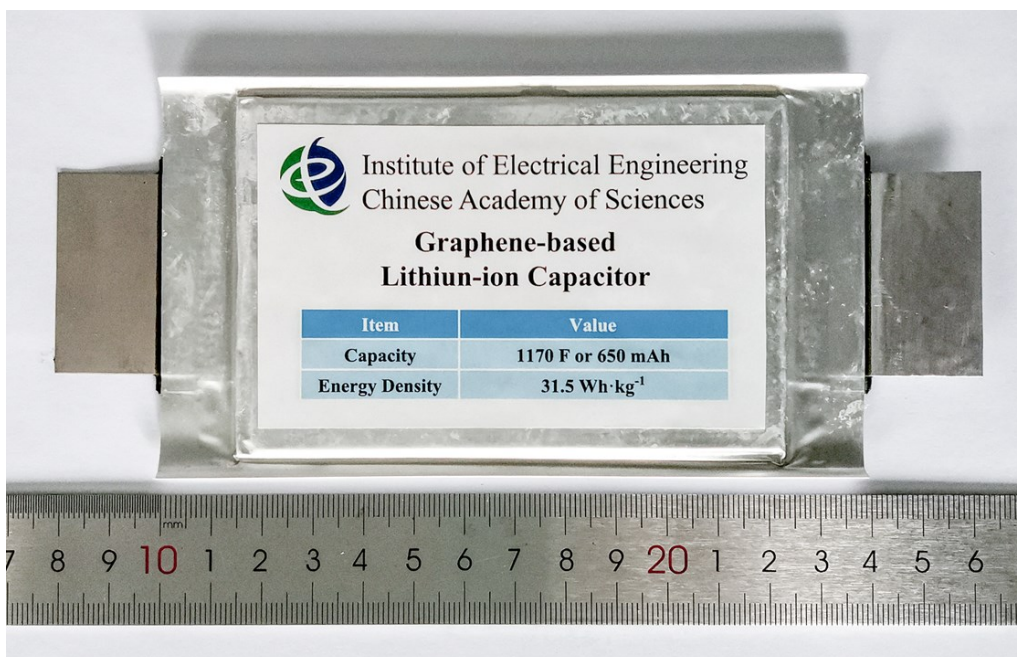

**Figure S4.** The photograph of the large-capacity LIC pouch cell (G/SC//AC).

**Table S1.** The fitting results of half-cell equivalent circuit assembled using pure SC and G/SC composites.

|           | $R_0$          | $R_{ct}$       | $Q_{ct}$   |
|-----------|----------------|----------------|------------|
| Pure SC   | 11.89 $\Omega$ | 101.7 $\Omega$ | 1.16E-4 F  |
| G/SC-2.5% | 10.92 $\Omega$ | 69.09 $\Omega$ | 1.74 E-4 F |
| G/SC-5%   | 18.01 $\Omega$ | 85.74 $\Omega$ | 2.02 E-4 F |

**Table S2.** The detailed comparison between G/AC//G/SC and other LICs reported in the literature using similar anode and cathode materials.

| <b>Cathode material</b>                                               | <b>Anode material</b>                           | <b>voltage window</b> | <b>Energy density</b>                                              | <b>Cycling performance</b>                                                  | <b>Ref.</b> |
|-----------------------------------------------------------------------|-------------------------------------------------|-----------------------|--------------------------------------------------------------------|-----------------------------------------------------------------------------|-------------|
| Nitrogen-doped hierarchical carbon nanolayers (NHCNs)                 | Mesoporous graphene (SHSG)                      | 2.0-4.5 V             | 146 Wh kg <sup>-1</sup> at power density of 650 W kg <sup>-1</sup> | 91% retention after 40,000 cycles                                           | 1           |
| Commercial activated carbon (AC)                                      | Petroleum coke (PeC)                            | 0-4.0 V               | ~ 106.9 Wh kg <sup>-1</sup> at 33 W kg <sup>-1</sup>               | After a decay (40-50%), the capacity was fully maintained for 50,000 cycles | 2           |
| Commercial activated carbons (AC)                                     | Natural graphite                                | 1.5-5.0 V             | 145 Wh kg <sup>-1</sup> at 0.1 A g <sup>-1</sup>                   | 86% retention after 10,000 cycles (4.5V)                                    | 3           |
| Hierarchical porous activated carbon derived from sisal fibers (SFAC) | Graphitic carbon derived from sisal fibers (GC) | 2.0-4.0 V             | 104 Wh kg <sup>-1</sup> at 143 W kg <sup>-1</sup>                  | 96.5 % at 1 A g <sup>-1</sup> after 3,000 cycles.                           | 4           |
| Activated carbon (AC)                                                 | hard carbon (HC)                                | 2.0-3.9 V             | 82 Wh kg <sup>-1</sup> at 2.4 C                                    | 97% retention after 600 cycles                                              | 5           |
| Coconut shell derived mesoporous carbon (CS-AC)                       | Natural plant-derived hard carbon (HC)          | 1.7-4.2 V             | 121 Wh kg <sup>-1</sup> at 0.1 A g <sup>-1</sup>                   | 83% retention after 8,000 cycles                                            | 6           |
| Graphene enhanced active carbon (G/AC)                                | Graphene enhanced soft carbon (G/SC)            | 1.0-4.1 V             | 151 Wh kg <sup>-1</sup> at 241 W kg <sup>-1</sup>                  | 90% capacity retention after 10,000 cycles                                  | This work   |

**Table S3.** The detailed information of LIC pouch cell made of G/SC and AC.

| Active material                | G/SC-2.5% (anode)         | AC (cathode)               |
|--------------------------------|---------------------------|----------------------------|
| Proportion of active materials | 90%                       | 87%                        |
| Mass loading                   | 8.68 mg/cm <sup>2</sup>   | 12.62 mg/cm <sup>2</sup>   |
| Coating thickness              | 85 μm                     | 235 μm                     |
| Compacted density              | 1.02 mg/cm <sup>3</sup>   | 0.537 mg/cm <sup>3</sup>   |
| Current collector              | 8 μm Cu with 2 μm coating | 20 μm Al with 2 μm coating |
| Electrode size                 | 70 × 105 mm               | 67 × 102 mm                |
| Number of electrodes           | 16 PCS                    | 15 PCS                     |
| Separator                      | 30μm cellulose membrane   |                            |
| Discharge Capacity             | 650 mAh or 1170 F         |                            |
| Discharge energy               | 1.97 Wh                   |                            |
| Total mass                     | 62.5 g                    |                            |
| Internal resistance (at 1 kHz) | 4 mΩ                      |                            |
| Energy density (at 1 C)        | 31.5 Wh/kg                |                            |
| Power density (at 200 C)       | 5.01 kW/kg                |                            |

## References

1. C. Li, X. Zhang, K. Wang, X. Sun and Y. Ma, *Carbon*, 2018, **140**, 237-248.
2. M. Schroeder, M. Winter, S. Passerini and A. Balducci, *J. Power Sources*, 2013, **238**, 388-394.
3. V. Khomenko, E. Raymundo-Piñero and F. Béguin, *J. Power Sources*, 2008, **177**, 643-651.
4. Z. Yang, H. Guo, X. Li, Z. Wang, J. Wang, Y. Wang, Z. Yan and D. Zhang, *J. Mater. Chem. A*, 2017, **5**, 15302-15309.
5. W. Cao and J. Zheng, *J. Power Sources*, 2012, **213**, 180-185.
6. S. Jayaraman, A. Jain, M. Ulaganathan, E. Edison, M. P. Srinivasan, R. Balasubramanian, V. Aravindan and S. Madhavi, *Chem. Eng. J.*, 2017, **316**, 506-513.



## **Supporting Video**

Video S1. LIC pouch cell power an electric car model for 84 minutes on a single charge.

Video S2. LIC pouch cell is charged to 4 V within tens of seconds at 100 C.
